# Supplementary material
Source: publisher figshare collection journal article supplement (https://acs.figshare.com/ndownloader/files/5740281)
Supplement: Supplementary file 1 [file 5740281]

## Supporting Information

### Thermodynamic rearrangement synthesis and NMR structures of C<sub>1</sub>, C<sub>3</sub> and T isomers of C<sub>60</sub>H<sub>36</sub>

*(Andrei A. Gakh\*, Andrew Yu. Romanovich and Ad Bax)*

#### Part 1. Structure determination of C<sub>1</sub>, C<sub>3</sub> and T isomers.

The key to solving the structure of the C<sub>1</sub> isomer was the identification of six CH groups interconnected in a six-membered ring (Table S1). Only one such combination was found: A2-K39-A3-K38-A4-K43, and only one placement was possible in the C<sub>60</sub> framework (Figure S1a). The discovery of this key fragment allows for step-by-step structure solution. Next was the identification of three CH-CH-CH(CH)<sub>2</sub> fragments attached to K39, K38 and K43 (all meta) positions of the six member ring. Again, only one possible placement of these three fragments was possible due to the fact that there was no additional inter-correlation between CH groups in these three fragments as well as between them and the A2-K39-A3-K38-A4-K43 fragment. This unique placement unveils three benzene rings in the structure. This was later confirmed by the structural analysis of the C<sub>3</sub> isomer (see discussion below).

**Table S1.** Signal correlations in the three C<sub>60</sub>H<sub>36</sub> isomers

| Signal                | COSY-HSQC correlations | TOCSY-HSQC correlations <sup>a</sup> | Signal     | COSY-HSQC correlations | TOCSY-HSQC correlations <sup>a</sup> |
|-----------------------|------------------------|--------------------------------------|------------|------------------------|--------------------------------------|
| C <sub>1</sub> isomer |                        |                                      |            |                        |                                      |
| <b>A2</b>             | K39, K43               | H25, H26                             | <b>G22</b> | H26, J47               | F7, C15                              |
| <b>A3</b>             | K38, K39               | H21, H25                             | <b>G29</b> | H21, J37               | F9a, C18, K38                        |
| <b>A4</b>             | K38, K43               | H21, H26                             | <b>H21</b> | G29, K38               | A3, A4                               |
| <b>B40</b>            | L8, C14                | E10, D27, J45; D16                   | <b>H25</b> | G20, K39               | A3, J45                              |
| <b>B41</b>            | C15, L17               | E6, D28, D27                         | <b>H26</b> | G22, K43               |                                      |
| <b>C14</b>            | B40, J45               | L8, G20                              | <b>I30</b> | F11, E19               | J45; D16, D27                        |
| <b>C15</b>            | B41, J47               | F7, L17, G22                         | <b>31</b>  | D16, D28               | L17, C18                             |
| <b>C18</b>            | J37                    | F9a, 31, I34                         | <b>I34</b> | E6, F9a                | L17, J37; C18, L33                   |
| <b>D16</b>            | 31, L33                | E19, I30, B40                        | <b>I36</b> | F7, E10                | J47; D27, D28                        |
| <b>D27</b>            | L8                     | B40, E10; I30, I36, B41              | <b>J37</b> | F9a, C18, G29          | H21, I34                             |
| <b>D28</b>            | L17, 31                | E6, B41; I36                         | <b>J45</b> | F11, C14, G20          | H25, I30                             |
| <b>E6</b>             | L17, I34               | D28                                  | <b>J47</b> | F7, C15, G22           |                                      |
| <b>E10</b>            | L8, I36                | D27, B40                             | <b>K38</b> | A3, A4, H21            | G29                                  |
| <b>E19</b>            | I30, L33               | D16                                  | <b>K39</b> | A2, A3, H25            | G20, K43                             |
| <b>F7</b>             | I36, J47               | G22                                  | <b>K43</b> | A2, A4, H26            | K38                                  |
| <b>F9a</b>            | I34, J37               | E6, C18                              | <b>L8</b>  | E10, D27, B40          | C14, I36                             |
| <b>F11</b>            | I30, J45               | E19, G20                             | <b>L17</b> | E6, D28, B41           | I34, 31                              |
| <b>G20</b>            | H25, J45               | F11, C14                             | <b>L33</b> | D16, E19               | 31, I34                              |
|                       |                        |                                      |            |                        |                                      |
| C <sub>3</sub> isomer |                        |                                      |            |                        |                                      |
| <b>A1</b>             | K44                    | H24                                  | <b>G23</b> | H24, J46               | F5, C13, K44                         |
| <b>B42</b>            | L9b, C13               | E12, J46, D32                        | <b>H24</b> | G23, K44               | A1, J46                              |
| <b>C13</b>            | B42, J46               | F5, L9b, G23                         | <b>I35</b> | F5                     | L9b, J46, D32                        |
| <b>D32</b>            | L9b                    | I35, B42                             | <b>J46</b> | F5, C13, G23           | H24, I35, B42                        |
| <b>E12</b>            | L9b                    | D32, B42                             | <b>K44</b> | A1, H24                |                                      |
| <b>F5</b>             | I35, J46               | C13, G23                             | <b>L9b</b> | E12, D32, B42          |                                      |
|                       |                        |                                      |            |                        |                                      |
| T isomer              |                        |                                      |            |                        |                                      |
| <b>A</b>              | K                      | H                                    |            |                        |                                      |
| <b>H</b>              | K                      |                                      |            |                        |                                      |
| <b>K</b>              | A, H                   |                                      |            |                        |                                      |
|                       |                        |                                      |            |                        |                                      |

<sup>a</sup>Only <sup>5</sup>J, <sup>4</sup>J and/or relay peaks are shown

At this stage complete analysis of all the possible locations of the remaining CH groups and the three double bonds (gray area, Figure S1b) become feasible. The task was further simplified by identification of two CH(CH)<sub>3</sub> fragments: L17(E6,D28,B41) and L8(E10,D27,B40) leading to only two<sup>S1</sup> possible structures (Figure S2). From these two structures only one structure fit the connectivity data pattern (Figure S2a).

Final confirmation of this unique assignment has been made by evaluation of the results of the TOCSY experiments showing relayed and long-range ( $^4J$ ,  $^5J$ ,)<sup>S2</sup> correlations (Table S1).

<sup>s2</sup> Spielmann, H. P.; Weedon, B. R.; Meier, M. S. *J. Org. Chem.* **2000**, *65*, 2755-2756, and references 12, 13 and 15 therein.

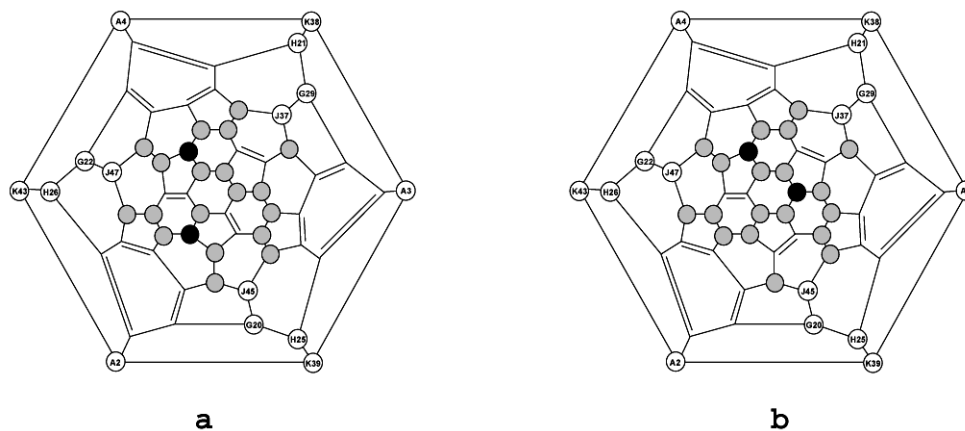

**Figure S2.** The only two possible structures of  $C_1$  isomer having two additional  $\text{CH}(\text{CH})_3$  fragments (centers of these two fragments are in solid black). One of these structures (left) corresponds to the actual structure of the  $C_1$  isomer (see Figure S1c); the other was rejected on the basis of incompatibility with the COSY-HSQC spectrum.

Structure analysis of the  $C_3$  isomer can be initiated by the identification of the signals of three identical  $\text{CH}-\text{CH}-\text{CH}-\text{CH}-\text{CH}(\text{CH})_2$  fragments as A1-K44-H24-G23-J46 (C13,F5) using the COSY-HSQC connectivity (Table S1, Figure S3). Due to  $C_3$  symmetry there is only one possible placement of these three fragments in the  $C_{60}$  framework (Figure S4a).

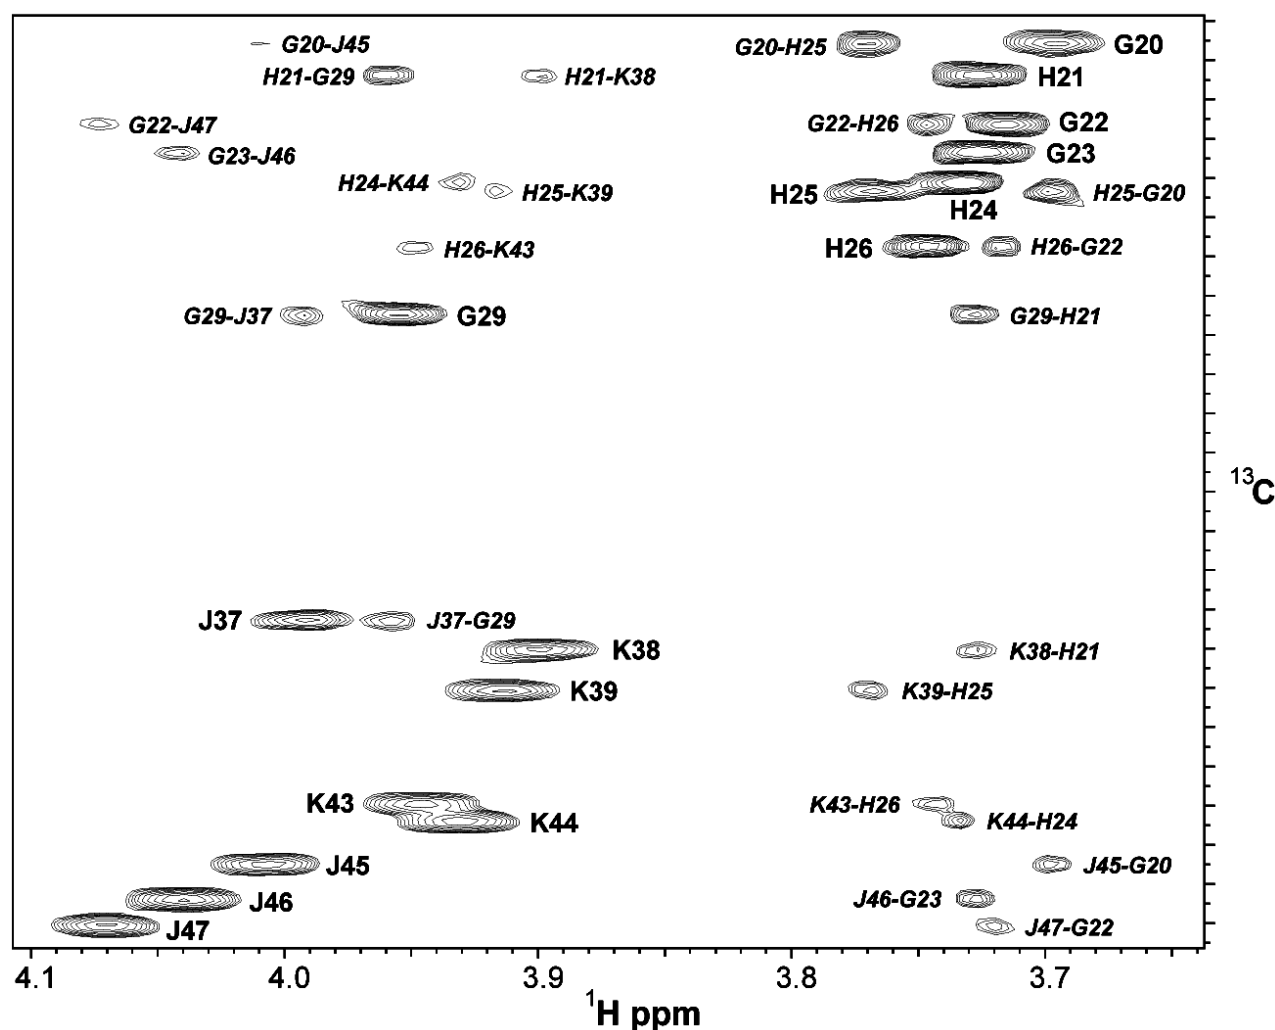

**Figure S3.**  $^1\text{H}$ - $^{13}\text{C}$  COSY-HSQC spectra, expanded region of G, H, J and K signals. The diagonal resonances (one-bond  $^1\text{H}$ - $^{13}\text{C}$  correlations) are phases absorptive in both dimensions; cross-peaks are antiphase in the  $^1\text{H}$  dimension but are  $90^\circ$  out of phase, creating the appearance of narrow absorptive resonances when only positive contours are displayed. One-bond  $^1\text{H}$ - $^{13}\text{C}$  connectivities are marked in regular font. Cross peaks are marked in italic. Blank regions in the  $^{13}\text{C}$  dimension of the spectrum have been deleted for clarity, and the  $^{13}\text{C}$  scale is therefore highly non-linear.

The unique placement confirms the similarity between the  $C_1$  and  $C_3$  structures: type A, K, J, H and G signals were found within the same areas of the 2D ( $^1\text{H}$ ,  $^{13}\text{C}$ ) spectrum for both isomers (Figure 1). It also narrows the placement of the CH groups remaining within the gray area of Figure S4a. The final assignment (Figure S4b) was made after complete analysis of all the possible candidates to fit both the COSY-HSQC connectivity pattern and the  $C_3$  symmetry requirements.<sup>s1</sup> The structure was confirmed by the TOCSY-HSQC experiment (Table S1).<sup>s3</sup>

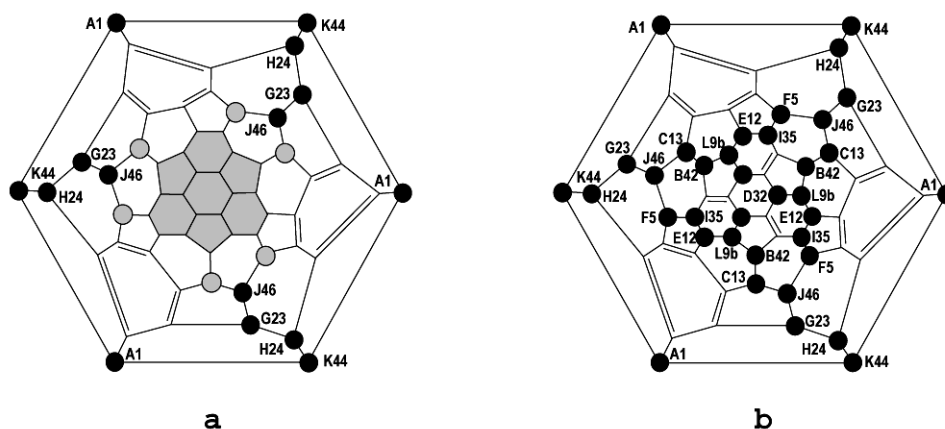

**Figure S4.** Structure elucidation of the  $C_3$  isomer.

---

<sup>s3</sup>The  $C_3$  isomer has particularly strong COSY cross peaks associated with the CH groups surrounding the double bonds (such as D and I; D and B). A plausible explanation can be found in the unique symmetry-related structural features of the  $C_3$  isomer: D groups are in both cis- and trans- positions relative to groups I and B, thus multiplying usually weak  $J^5$  constants across a double bond  $\pi$  electron system. The same correlations across the isolated double bonds were found in the  $C_1$  isomer, but they are much weaker. More details regarding long-range  $^1\text{H}$ - $^1\text{H}$  constants ( $J^5$ - $J^7$ ) in hydro[60]fullerenes can be found in references 7 and S2.

The structural elucidation of the elusive<sup>5</sup> T C<sub>60</sub>H<sub>36</sub> isomer was made by using the results of 2D NMR experiments and computer analysis. First, all the possible structures of T C<sub>60</sub>H<sub>36</sub> isomers (the only two) were identified (Figure S5).<sup>s1</sup> Both T isomers were found to be consistent with the COSY connectivity data (Table S1). The selection was made on the basis of the HSQC <sup>1</sup>H, <sup>13</sup>C chemical shift analysis (Figure 1), and was further supported by calculations of relative thermodynamic stabilities (the T isomer **a** is almost 50 kcal/mol less thermodynamically stable than the selected one, **b**). Similar computational results have been reported previously.<sup>13</sup>

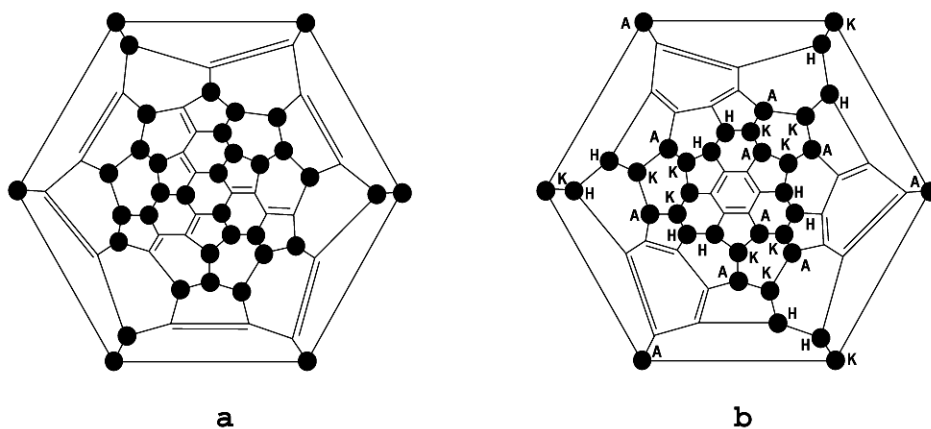

**Figure S5.** Structure elucidation of the T isomer.

Part 2. Compatibility studies of  $C_1$ ,  $C_3$ , and T isomers of  $C_{60}H_{36}$  and  $C_{3v}$  isomer of  $C_{60}H_{18}$ .

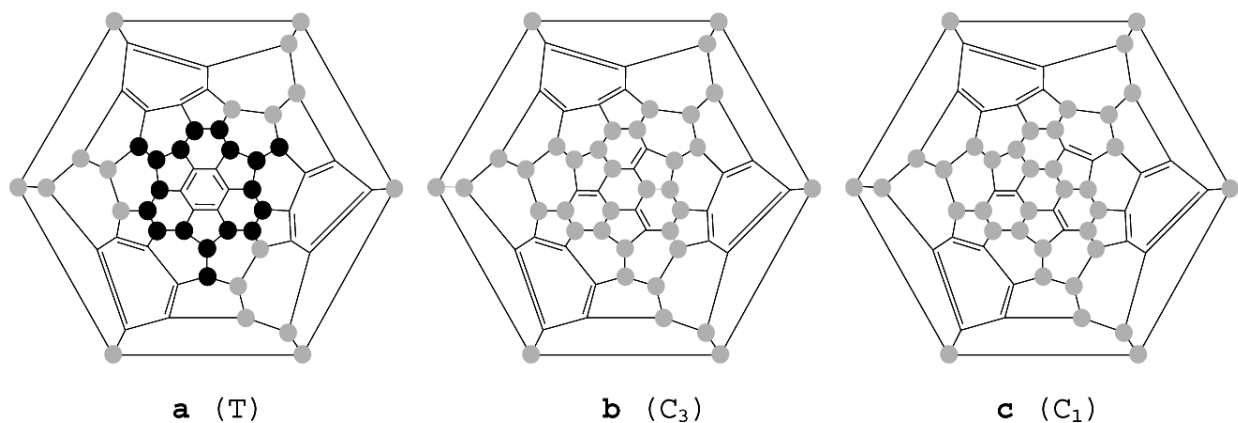

**Figure S6.** Compatibility/Incompatibility study of  $C_{3v}$   $C_{60}H_{18}$  versus T,  $C_3$  and  $C_1$ , isomers of  $C_{60}H_{36}$ . Compatible hydrogenated fragments of T  $C_{60}H_{36}$  and  $C_{3v}$   $C_{60}H_{18}$  are presented as black dots (S6a). No compatible hydrogenated fragments were found for the other isomers (S6b, S6c).



### Part 3. Bibliographic materials

Avent AG, Clare BW, Hitchcock PB, Kepert DL, Taylor R  
C60F36: there is a third isomer and it has C-1 symmetry  
CHEM COMMUN (20): 2370-2371 2002

Clare BW, Kepert DL  
Structures, stabilities and isomerism in C60H36 and C60F36. A comparison of the AM1 Hamiltonian and density functional techniques  
J MOL STRUC-THEOCHEM 589: 195-207 2002

Clare BW, Kepert DL  
Structures and isomerism in C70X36, X = H, F. A comparison with C60X36  
J MOL STRUC-THEOCHEM 583: 45-62 2002

Meletov KP, Assimopoulos S, Kourouklis GA, et al.  
Phase transitions in hydrofullerene C60H36 studied by luminescence and Raman spectroscopy at pressures up to 12 GPa  
PHYS SOLID STATE 44(3): 542-544 2002

Pimenova SM, Melkhanova SV, Kolesov VP, et al.  
The enthalpy of formation and C-H bond enthalpy of hydrofullerene C60H36  
J PHYS CHEM B 106(9): 2127-2130 2002

Nossal J, Saini RK, Alemany LB, et al.  
The synthesis and characterization of fullerene hydrides  
EUR J ORG CHEM(22): 4167-4180 2001

Wang NX, Wang L, Liu W, et al.  
Some thermal decomposition reactions of C60H36  
TETRAHEDRON LETT 42(44): 7911-7913 2001

Tarasov BP, Goldshleger NF, Moravsky AP  
Hydrogen-containing carbon nanostructures: Synthesis and properties  
USP KHIM+ 70(2): 149-166 2001

Nossal J, Saini RK, Sadana AK, et al.  
Formation, isolation, spectroscopic properties, and calculated properties of some isomers of C60H36  
J AM CHEM SOC 123(35): 8482-8495 2001

Gol'dshleger NF, Shul'ga YM, Roshchupkina OS, et al.  
Reaction of platinum fulleride C60Pt with dihydroanthracene  
RUSS J GEN CHEM+ 71(1): 114-118 2001

Okamoto Y  
Ab initio investigation of hydrogenation of C-60  
J PHYS CHEM A 105(32): 7634-7637 2001

Goldshleger NF  
Fullerenes and fullerene-based materials in catalysis  
FULLERENE SCI TECHN 9(3): 255-280 2001

Lebedev BV  
Thermodynamic properties of fullerenes and their derivatives  
RUSS J PHYS CHEM 75(5): 687-704 2001

- Bulusheva LG, Okotrub AV, Antich AV, et al.  
Ab initio calculation of X-ray emission and IR spectra of the hydrofullerene C<sub>60</sub>H<sub>36</sub>  
J MOL STRUCT 562(1-3): 119-127 2001
- Dorozhko PA, Lobach AS, Popov AA, et al.  
Sublimation of hydrofullerenes C<sub>60</sub>H<sub>36</sub> and C<sub>60</sub>H<sub>18</sub>  
CHEM PHYS LETT 336(1-2): 39-46 2001
- Stoldt CR, Maboudian R, Carraro C  
Vibrational spectra of hydrogenated buckminsterfullerene: A candidate for the unidentified infrared emission  
ASTROPHYS J 548(2): L225-L228 Part 2 2001
- Meletov KP, Tsilika I, Assimopoulos S, et al.  
High-pressure effects in hydrofullerene C<sub>60</sub>H<sub>36</sub> studied by Raman spectroscopy  
PHYS STATUS SOLIDI B 223(2): 459-467 2001
- Tuinman AA, Lahamer AS, Compton RN  
Studies of low-energy electron attachment at surfaces  
INT J MASS SPECTROM 205(1-3): 309-323 Sp. Iss. SI 2001
- Meletov KP, Assimopoulos S, Tsilika I, et al.  
Isotopic and isomeric effects in high-pressure hydrogenated fullerenes studied by Raman spectroscopy  
CHEM PHYS 263(2-3): 379-388 JAN 15 2001
- Jenkins S, Heggie MI, Taylor R  
Aromaticity of [60]fullerene derivatives(C<sub>60</sub>X<sub>n</sub>, X = H, F; n=18, 36) constrained to have planar hexagonal rings  
J CHEM SOC PERK T 2(12): 2415-2419 2000
- Lebedev BV, Bykova TA, Lobach AS  
Thermodynamic properties of hydrofullerene C<sub>60</sub>H<sub>36</sub> from 5 to 340 K  
J THERM ANAL CALORIM 62(1): 257-265 2000
- Okotrub AV, Bulusheva LG, Asanov IP, et al.  
Study of the electronic structure of the series of isomers of hydrofullerene C<sub>60</sub>H<sub>36</sub>  
ZH NEORG KHIM+ 45(3): 523-532 2000
- Vasil'ev Y, Wallis D, Nuchter M, et al.  
From major to minor and back - a decisive assessment of C<sub>60</sub>H<sub>36</sub> with respect to the Birch reduction of C-60  
CHEM COMMUN (14): 1233-1234 2000
- Muramatsu Y, Ueno Y, Hayashi T, et al.  
Soft X-ray emission and absorption spectroscopy of hydrofullerene  
J ELECTRON SPECTROSC 107(2): 177-184 2000
- Lebedev BV, Bykova TA, Lobach AS  
Thermodynamic properties of hydrofullerene C<sub>60</sub>H<sub>36</sub> in the range of 0-340 K  
DOKL AKAD NAUK+ 368(5): 629-631 1999
- Moder M, Nuchter M, Ondruschka B, et al.  
Unimolecular ion dissociation and laser-induced coalescence of hydrogenated fullerenes  
INT J MASS SPECTROM 196: 599-607 Sp. Iss. SI 2000

Lobach AS, Strelets VV  
Electrochemical behavior and parameters of hydrofullerene C<sub>60</sub>H<sub>36</sub>  
RUSS CHEM B+ 48(11): 2060-2064 1999

Boltalina OV, Buhl M, Khong A, et al.  
The He-3 NMR spectra of C<sub>60</sub>F<sub>18</sub> and C<sub>60</sub>F<sub>36</sub>; the parallel between hydrogenation and fluorination  
J CHEM SOC PERK T 2(7): 1475-1479 1999

Clare BW, Kepert DL  
The structures of C<sub>60</sub>F<sub>36</sub> and new possible structures for C<sub>60</sub>H<sub>36</sub>  
J MOL STRUC-THEOCHEM 466: 177-186 1999

Osaki T, Tanaka T, Tai Y  
Hydrogenation of C-60 on alumina-supported nickel and thermal properties of C<sub>60</sub>H<sub>36</sub>  
PHYS CHEM CHEM PHYS 1(9): 2361-2366 1999

Okotrub AV, Bulusheva LG, Asanov IP, et al.  
X-ray spectroscopic and quantum-chemical characterization of hydrofullerene C<sub>60</sub>H<sub>36</sub>  
J PHYS CHEM A 103(6): 716-720 1999

Buhl M, Kaupp M, Malkina OL, et al.  
The DFT route to NMR chemical shifts  
J COMPUT CHEM 20(1): 91-105 1999

Tkachenko LI, Lobach AS, Strelets VV  
Redox-induced hydrogen transfer from hydrofullerene C<sub>60</sub>H<sub>36</sub> to fullerene C-60  
RUSS CHEM B+ 47(6): 1105-1107 1998

Hall LE, McKenzie DR, Davis RL, et al.  
Structural determination of the hydrofullerene C<sub>60</sub>D<sub>36</sub> by neutron diffraction  
ACTA CRYSTALLOGR B 54: 345-350 Part 3 1998

Palit DK, Mohan H, Mittal JP  
Photophysical properties of C<sub>60</sub>H<sub>18</sub> and C<sub>60</sub>H<sub>36</sub>: A laser flash photolysis and pulse radiolysis study  
J PHYS CHEM A 102(24): 4456-4461 JUN 11 1998

Bini R, Ebenhoch J, Fanti M, et al.  
The vibrational spectroscopy of C<sub>60</sub>H<sub>36</sub>: An experimental and theoretical study  
CHEM PHYS 232(1-2): 75-94 JUN 15 1998

Lobach AS, Shul'ga YM, Roshchupkina OS, et al.  
C<sub>60</sub>H<sub>18</sub>, C<sub>60</sub>H<sub>36</sub> and C<sub>70</sub>H<sub>36</sub> fullerene hydrides: Study by methods of IR, NMR, XPS, EELS and magnetochemistry  
FULLERENE SCI TECHN 6(3): 375-391 1998

Shul'ga YM, Lobach AS, Morozov YG, et al.  
X-ray photoelectron spectra and magnetic properties of hydrides of fullerenes C<sub>60</sub>H<sub>36</sub> and C<sub>70</sub>H<sub>36</sub>  
ZH FIZ KHIM+ 72(1): 115-118 1998

Dentinger PM, Taylor JW  
Increasing plasma etch resistance of resists using fullerene additives  
J VAC SCI TECHNOL B 15(6): 2575-2581 1997

Lobach AS, Perov AA, Rebrov AI, et al.  
Preparation and study of hydrides of fullerenes C-60 and C-70  
RUSS CHEM B+ 46(4): 641-648 1997

Goldshleger NF, Moravskii AP  
Fullerene hydrides: Preparation, properties, and structure  
USP KHIM+ 66(4): 353-375 1997

Fowler PW, Sandall JPB, Taylor R  
Structural parallels in hydrogenated and fluorinated [60]- and [70]-fullerenes  
J CHEM SOC PERK T 2(3): 419-423 1997

Bensasson RV, Hill TJ, Land EJ, et al.  
Spectroscopy and photophysics of C<sub>60</sub>H<sub>18</sub> and C<sub>60</sub>H<sub>36</sub>  
CHEM PHYS 215(1): 111-123 1997

Billups WE, Gonzalez A, Gesenberg C, et al.  
He-3 NMR spectra of highly reduced C-60  
TETRAHEDRON LETT 38(2): 175-178 JAN 13 1997

Drelinkiewicz A, Byszewski P, Bielanski A  
Catalytic hydrogenation of C-60 fullerene  
REACT KINET CATAL L 59(1): 19-27 SEP 1996

Sui YL, Qian JX, Zhang J, et al.  
Direct and catalytic hydrogenation of buckminsterfullerene C-60  
FULLERENE SCI TECHN 4(5): 813-818 1996

Avent AG, Birkett PR, Darwish AD, et al.  
Recent developments in hydrogenation and arylation of [60]- and [70]fullerenes  
MOL CRYST LIQ CRYST C 7(1-4): 33-40 1996

Darwish AD, Abdulsada AK, Langley GJ, et al.  
Polyhydrogenation of [60]- and [70]fullerenes with Zn/HCl and Zn/DCI  
SYNTHETIC MET 77(1-3): 303-307 1996

Shylga YM, Rubtsov VI, Lobach AS, et al.  
Loss functions of C<sub>60</sub>H<sub>36</sub> buckminsterfullerene hydride  
PISMA ZH TEKH FIZ+ 21(21): 75-78 1995

Darwish AD, Abdulsada AK, Langley GJ, et al.  
Polyhydrogenation of [60]-fullerenes and [70]-fullerenes  
J CHEM SOC PERK T 2(12): 2359-2365 1995

Buhl M, Thiel W, Schneider U  
Magnetic-properties of c<sub>60</sub>h<sub>36</sub> isomers  
J AM CHEM SOC 117(16): 4623-4627 1995

Clare BW, Kepert DL  
An analysis of the 63 possible isomers of C<sub>60</sub>H<sub>36</sub> containing a threefold axis - a new structure for C<sub>60</sub>H<sub>20</sub>  
THEOCHEM-J MOL STRUC 121: 71-83 1994

Book LD, Scuseria GE  
Isomers of C<sub>60</sub>H<sub>36</sub> and C<sub>70</sub>H<sub>36</sub>  
J PHYS CHEM-US 98(16): 4283-4286 1994

Clare BW, Kepert DL  
Structures and stabilities of hydrofullerenes - completion of a tetrahedral fused quadruple crown structure and a double crown structure at C<sub>60</sub>H<sub>36</sub>  
THEOCHEM-J MOL STRUC 110(3): 181-189 FEB 20 1994

Dunlap BI, Brenner DW, Schriver GW  
Symmetrical isomers of C<sub>60</sub>H<sub>36</sub>  
J PHYS CHEM-US 98(7): 1756-1757 1994

Chandrasekhar J  
Evidence for a novel structure of C<sub>60</sub>H<sub>36</sub>  
CURR SCI INDIA 65(11): 803-803 1993

Govindaraj A  
Investigations of the fullerene hydride C<sub>60</sub>H<sub>36</sub>  
CURR SCI INDIA 65(11): 868-870 1993

Gerst M, Beckhaus Hd, Ruchardt C, et al.  
[7H]benzanthrene, a catalyst for the transfer hydrogenation of C-60 and C-70 by 9,10-dihydroanthracene  
TETRAHEDRON LETT 34(48): 7729-7732 1993

Banks MR, Dale MJ, Gosney I, et al.  
Birch reduction of C(60) - a new appraisal  
J CHEM SOC CHEM COMM (14): 1149-1152 1993

Austin SJ, Batten RC, Fowler PW, et al.  
A prediction of the structure of C<sub>60</sub>H<sub>36</sub>  
J CHEM SOC PERK T 2(7): 1383-1386 1993

Attalla MI, Vassallo AM, Tattam BN, ET AL.  
Preparation of hydrofullerenes by hydrogen radical-induced hydrogenation  
J PHYS CHEM-US 97(24): 6329-6331 1993

Hall LE, Mckenzie DR, Attalla MI, et al.  
The structure of C<sub>60</sub>H<sub>36</sub>  
J PHYS CHEM-US 97(21): 5741-5744 1993

Rathna A, Chandrasekhar, J  
Theoretical-study of hydrogenated buckminsterfullerene derivatives with benzenoid rings, C<sub>60</sub>H<sub>60-6N</sub>(N=1-8)  
CHEM PHYS LETT 206(1-4): 217-224 1993

Book LD, Scuseria GE  
Predicting the lowest energy isomers of C<sub>60</sub>H<sub>36</sub> and C<sub>70</sub>H<sub>36</sub>  
ABSTR PAP AM CHEM S 205: 171-CHED Part 1; 220-PHYS Part 2 MAR 28 1993

Guo T, Scuseria GE  
Abinitio calculations of tetrahedral hydrogenated buckminsterfullerene  
CHEM PHYS LETT 191(6): 527-532 1992

Dunlap BI, Brenner DW, Mintmire JW, et al.  
Geometric and electronic-structures of C<sub>60</sub>H<sub>60</sub>, C<sub>60</sub>F<sub>60</sub>, and C<sub>60</sub>H<sub>36</sub>  
J PHYS CHEM-US 95(15): 5763-5768 1991

Haufler RE, Conceicao J, Chibante LPF, et al.  
Efficient production of C<sub>60</sub> (buckminsterfullerene), C<sub>60</sub>H<sub>36</sub>, and the solvated  
buckide ion  
J PHYS CHEM-US 94(24): 8634-8636 1990
